# Supplementary figures and images for: Highly efficient electro-generation of H2O2by a nitrogen porous carbon modified carbonaceous cathode during the oxygen reduction reaction
Source: Royal Society of Chemistry journal article supplement (doi:10.1039/d0nj02360d), 2020-01-01

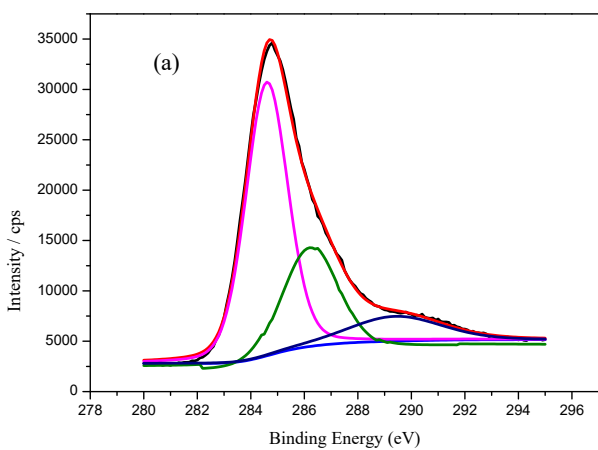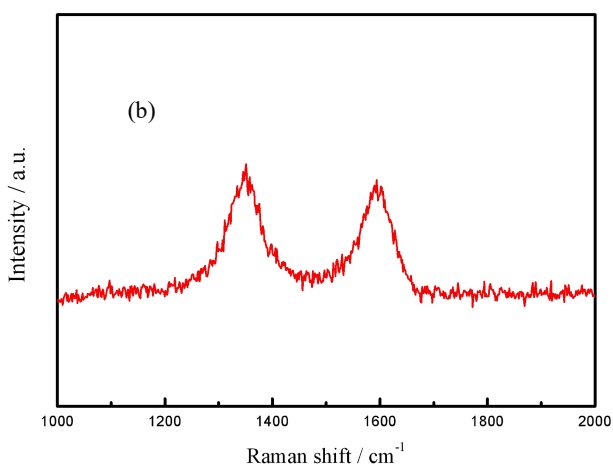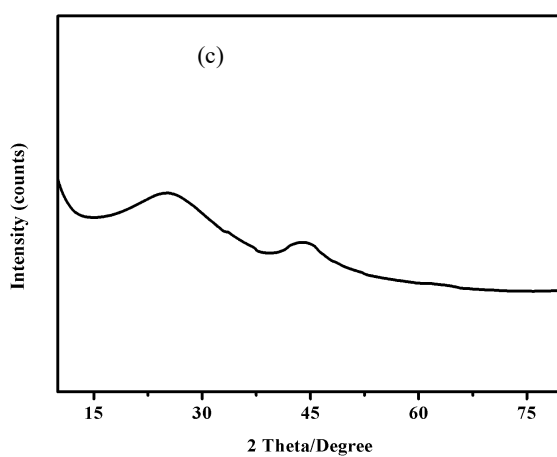

Fig. S1 The XPS (a); Raman (b) and XRD (c) of ACF

Supplement: d0nj02360d1.pdf [file d0nj02360d1.pdf]
